### ERRATUM

In the case report by Jankowski *et al.* entitled "Neuropathy following Axillary Brachial Plexus Block: Is It the Tourniquet?" published in the November 2003 issue of the Journal (ANESTHESIOLOGY 2003; 99:1230-2), the grant statement in the title page footnote on page 1230 incorrectly attributed the support of the Mayo Clinic and Foundation, Rochester, Minnesota, with regard to two of the authors. The correct support statement is: Supported by a grant from the Foundation for Anesthesia Education and Research, Rochester, Minnesota (to Dr. Jankowski); the Mayo Clinic and Foundation, Rochester, Minnesota (to Drs. Jankowski, Keegan, and Bolton); and by the Mayo Clinic and Foundation, Jacksonville, Florida (to Dr. Harrison). The publisher apologizes for this error.

### ERRATUM

In the case report by Boucek *et al.* entitled "Anesthesia Management of Orthotopic Liver Transplantation in a Patient with Mustard Repair of Transposition of Great Arteries and Superior Vena Caval Obstruction," published in the January 2004 issue of the Journal (ANESTHESIOLOGY 2004; 100:183-5), the last sentence on page 183 should read "Oxygen saturation remained between 98% and 100% throughout the operation, with  $\text{PaO}_2$  between 86 and 320 mmHg." The publisher regrets this error.
